# Supplementary material
Source: PubMed Central journal article supplement (PMC4918327)
Supplement: ncomms8906-s1.pdf [file ncomms8906-s1.pdf]

# Supplementary Figure 1

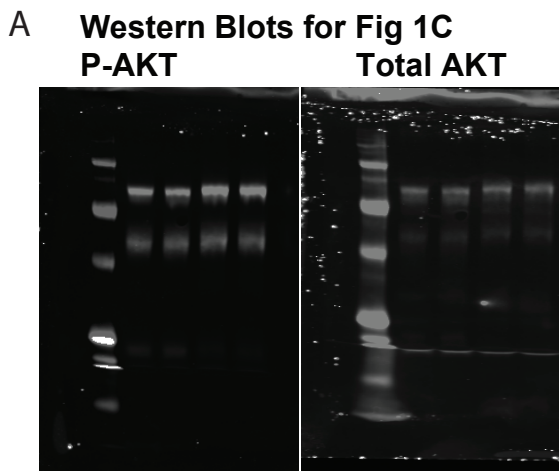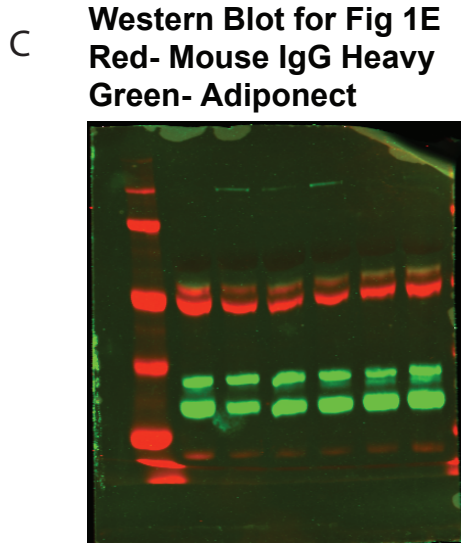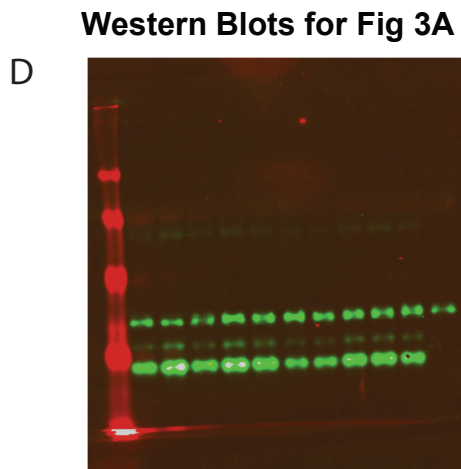

Wild Types- Lanes 1,3,6,7,9,10  
AiPKO- Lanes 2,4,5,8  
Lane 11- Adiponectin KO Mouse

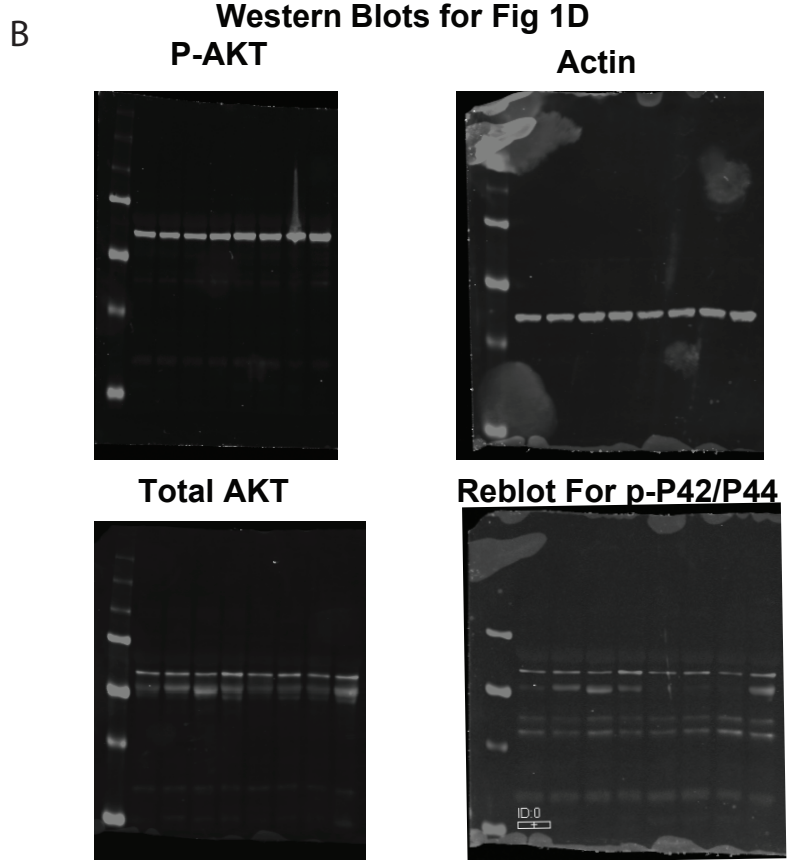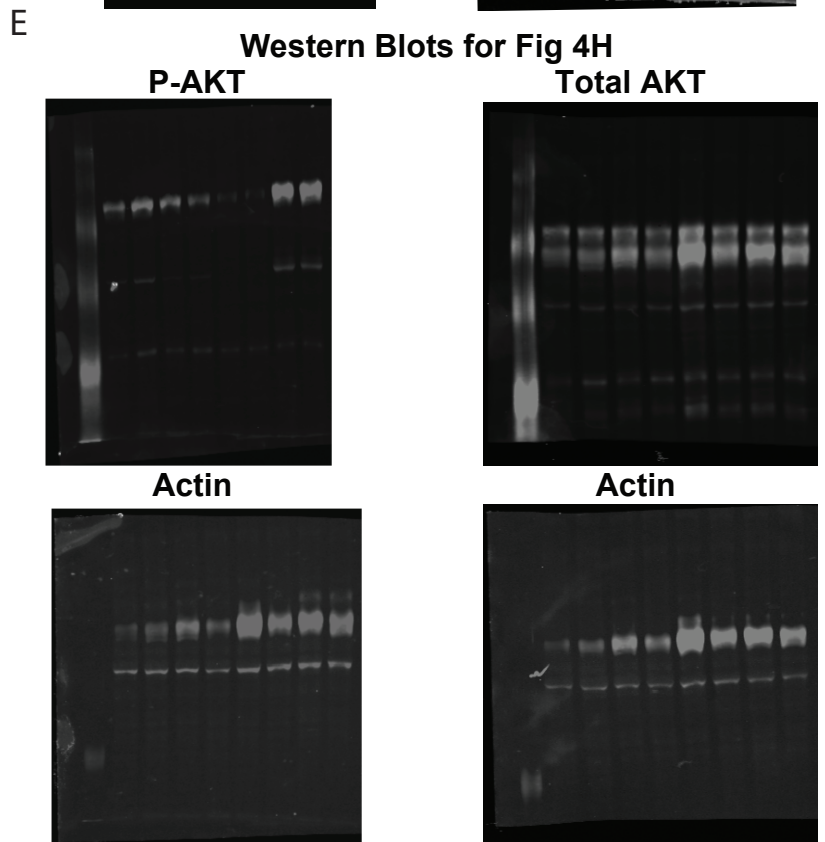

## Supplementary Figure 1

Complete set of western blots for all experiments. **A)** Western Blots of P-AKT and total AKT on isolated adipocytes stimulated with 1nm insulin for 10 minutes. **B)** Western Blots of p-AKT and, p-P44/P42, total AKT and actin on isolated gonadal adipose tissue following insulin stimulation for the indicated amount of time. **C)** Western blot of adiponectin and mouse IgG on mice which had been on doxycycline containing chow diet for 4 weeks. **D)** Western blot for adiponectin on serum from mice which had been in HFD food containing doxycycline for 6 weeks **E)** Western blot of P-AKT, AKT and actin on liver protein lysates of mice which had been on HFD for 5 months and were then stimulated with insulin for 15 minutes before sacrifice.

## Supplementary Table 1

|                |                           |                            |
|----------------|---------------------------|----------------------------|
| B-actin        | 5'-TGGCATTGTTACCAACTGGG   | 5'-GGGTCATCTTTTCACGGTTG    |
| TNF- $\alpha$  | 5'-TCTGTCTACTGAACTTCGGG   | 5'-ATCTGAGTGTGAGGGTCTG     |
| IL-6           | 5'-TCCAGTTGCCTTCTTGGGAC   | 5'-GTACTCCAGAAGACCAGAGG    |
| MCP-1          | 5'-TAAAAACCTGGATCGGAACCAA | 5'-GCATTAGCTTCAGATTTACGGGT |
| F4/80          | 5'-CTCAGTCTGCACCAATATCCTG | 5'-CCACAGAGTTAGAGCAGTTGGAA |
| PRDM16         | 5'-ACACGCAGTTCTCCAACCTGT  | 5'-CCCACAGTCCTTGCACTTGAT   |
| UCP-1          | 5'-TCTCAGCCGGCTTAATGACTG  | 5'-GGCTTGCATTCTGACCTTCAC   |
| PGC1- $\alpha$ | 5'-GCACCAGAAAACAGCTCCAAG  | 5'-CGTCAAACACAGCTTGACAGC   |
| PTEN           | 5'-CAATCATGTTGCAGCAATCACT | 5'-CCCATAAAAATCTAGGGCCTCT  |

### Supplementary Table 1

Quantitative PCR primers used in the studies reported here.
